# Supplementary material for: Hydrogen Peroxide and Nitric Oxide Crosstalk Mediates Brassinosteroids Induced Cold Stress Tolerance in Medicago truncatula
Source: PubMed Central journal article supplement (PMC6337477; doi:10.3390/ijms20010144), 2019-01-02
Supplement: ijms-20-00144-s001.pdf [file ijms-20-00144-s001.pdf]

**Table S1.** Primer sequences used for real-time quantitative RT-PCR

| <b>Gene</b>    | <b>Accession</b> | <b>F-primer</b>         | <b>R-primer</b>           |
|----------------|------------------|-------------------------|---------------------------|
| <i>MtAOX1</i>  | Medtr5g026620    | GAATGCTGCTCACTG         | CTCGTCCTTGGTAATGT         |
| <i>MtCBF1</i>  | EU139866         | GATTTGGCTTGG AACATA     | ACAGCATCCCTATCACTC        |
| <i>MtCBF2</i>  | EU139867         | GAAACTTAGATAAAATGGGTG   | GTAGCAGAGGTGGAAATAG       |
| <i>MtCBF3</i>  | EU139868         | ACAATGACAATGACAATGACAAT | AAAAACTCCATAGTGATACTTCCTC |
| <i>MtP5CS1</i> | AJ278818         | TGATTTGTGAGTTTTGCTAC    | CTCATAAGCAATTACAGAGC      |
| <i>MtCAS15</i> | EU139869         | GGTGATGCCCTTCACATA      | TCCCCATGGTGTCTTCC         |
| <i>MtFAD</i>   | A0A072V8W8_MEDTR | CATTTACTCAGATCGTGAAC    | CCACATGAGTGTCTGTAATA      |
| <i>MtACO1</i>  | XM003601545      | CCAAAGGGCTAGAGGCTGTTC   | GGTAGGTGACGCAAATGGAAA     |
| <i>MtACS2</i>  | AY0620022        | TGCCTACACCTTACTATCCAG   | TCTGTCCATAACTGTGCCTAA     |
| <i>MtACS7</i>  | XM003620831      | CGGTCTACCAGTTTCAGAGT    | TCAAGCATTCAATTCCAGCAC     |
| <i>MtACTIN</i> | XM003621972      | TGACCTTACCGATTCTTG      | CTGCTGCTTCCATTCCTAT       |
